# Supplementary material for: Reverse-D-4F improves endothelial progenitor cell function and attenuates LPS-induced acute lung injury
Source: Springer Nature journal article supplement (doi:10.1186/s12931-019-1099-6), 2019-06-26

**Additional file 1: Immunofluorescence identification of bone marrow derived- EPC.** MNCs from mice bone marrow cultured for 14 days showed endothelial cell-like morphology (A×100), took up DiI-ac-LDL (B×100), and bound lectin (C×100). EPC, cultured for 10 days and differentiated, expressed mature endothelial markers, such as CD31 (D×200) and vWF (E×200), which were identified by immunofluorescence under fluorescence microscopy. Scale bar (B and C) represented 100μm, and Scale bar (A, D and E) represented 50μm.

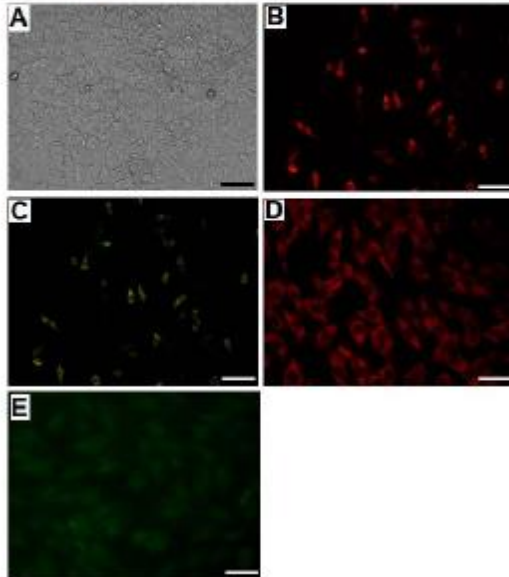

Supplement: MOESM1 [file 16856720]
