# Supplementary material for: Reverse-D-4F improves endothelial progenitor cell function and attenuates LPS-induced acute lung injury
Source: Springer Nature journal article supplement (doi:10.1186/s12931-019-1099-6), 2019-06-26

**Additional file 2:** (A): The effect of different concentrations of LPS on EPC viability. **\*\*P < 0.01** versus LPS (0 $\mu$ g /ml). (B): The effect of LPS on EPC was determined by cell cycle assessment.

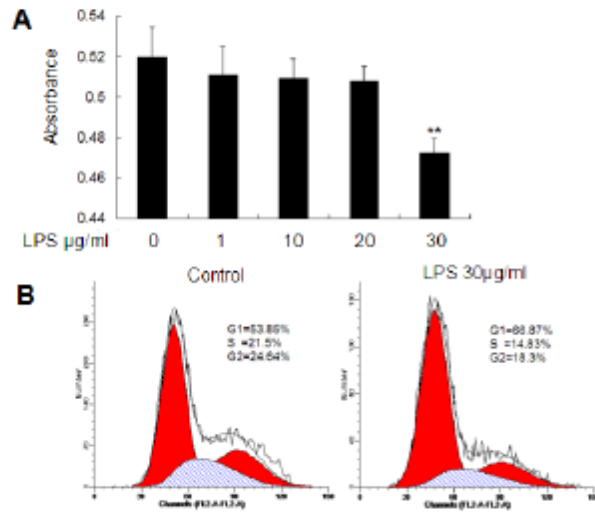

Supplement: MOESM2 [file 16856720]
